# Supplementary material for: Prognoses and Clinical Outcomes of Primary and Recurrent Uveal Melanoma
Source: PubMed Central journal article supplement — Cancer Res Treat. 2017 Dec 28;50(4):1238–51. doi: 10.4143/crt.2017.534 (PMC6192910; doi:10.4143/crt.2017.534), 2017-12-28
Supplement: crt-2017-534-suppl1.pdf [file crt-2017-534-suppl1.pdf]

**S1 Table.** Response rates of recurrent uveal melanoma patients treated with surgery, TACE or RFA, radiotherapy, and systemic therapies (n=49)

| Characteristic                    | Metastatectomy<br>(n=7) | TACE, RFA<br>(n=4) | RTx<br>(n=3) | Only systemic Tx <sup>a)</sup><br>(n=27) | None<br>(n=8) | p-value |
|-----------------------------------|-------------------------|--------------------|--------------|------------------------------------------|---------------|---------|
| <b>Disease control rate (DCR)</b> |                         |                    |              |                                          |               |         |
| No. (%)                           | 5 (71.4)                | 0                  | 0            | 9 (33.3)                                 |               | 0.035   |
| 95% CI                            | 24.98-84.25             | 0.00-54.59         | 0.00-54.59   | 22.64-56.05                              |               |         |
| CR                                | 1                       | 0                  | 0            | 0                                        |               |         |
| PR                                | 2                       | 0                  | 0            | 0                                        |               |         |
| SD                                | 2                       | 0                  | 0            | 9                                        |               |         |
| <b>OS2 (mo)</b>                   |                         |                    |              |                                          |               |         |
| Median                            | 134.73                  | 8.00               | 9.20         | 15.67                                    | 7.605         | 0.05    |
| 95% CI                            | 0.000-307.560           | 6.802-9.198        | N/A          | 13.219-18.121                            | 0.000-25.236  |         |

OS2, overall survival 2 (defined as the time from recurrence of uveal melanoma to death from any cause); RTx, radiotherapy; TACE, transarterial chemoembolization; RFA, radiofrequency ablation; Tx, treatment; 95% CI, 95% confidence interval; CR, complete response; PR, partial response; SD, stable disease. <sup>a)</sup>Includes chemotherapy (dacarbazine, platinum-based regimen, topotecan) and immunotherapy (interferon).
