# Supplementary material for: Prognoses and Clinical Outcomes of Primary and Recurrent Uveal Melanoma
Source: PubMed Central journal article supplement — Cancer Res Treat. 2017 Dec 28;50(4):1238–51. doi: 10.4143/crt.2017.534 (PMC6192910; doi:10.4143/crt.2017.534), 2017-12-28
Supplement: crt-2017-534-suppl2.pdf [file crt-2017-534-suppl2.pdf]

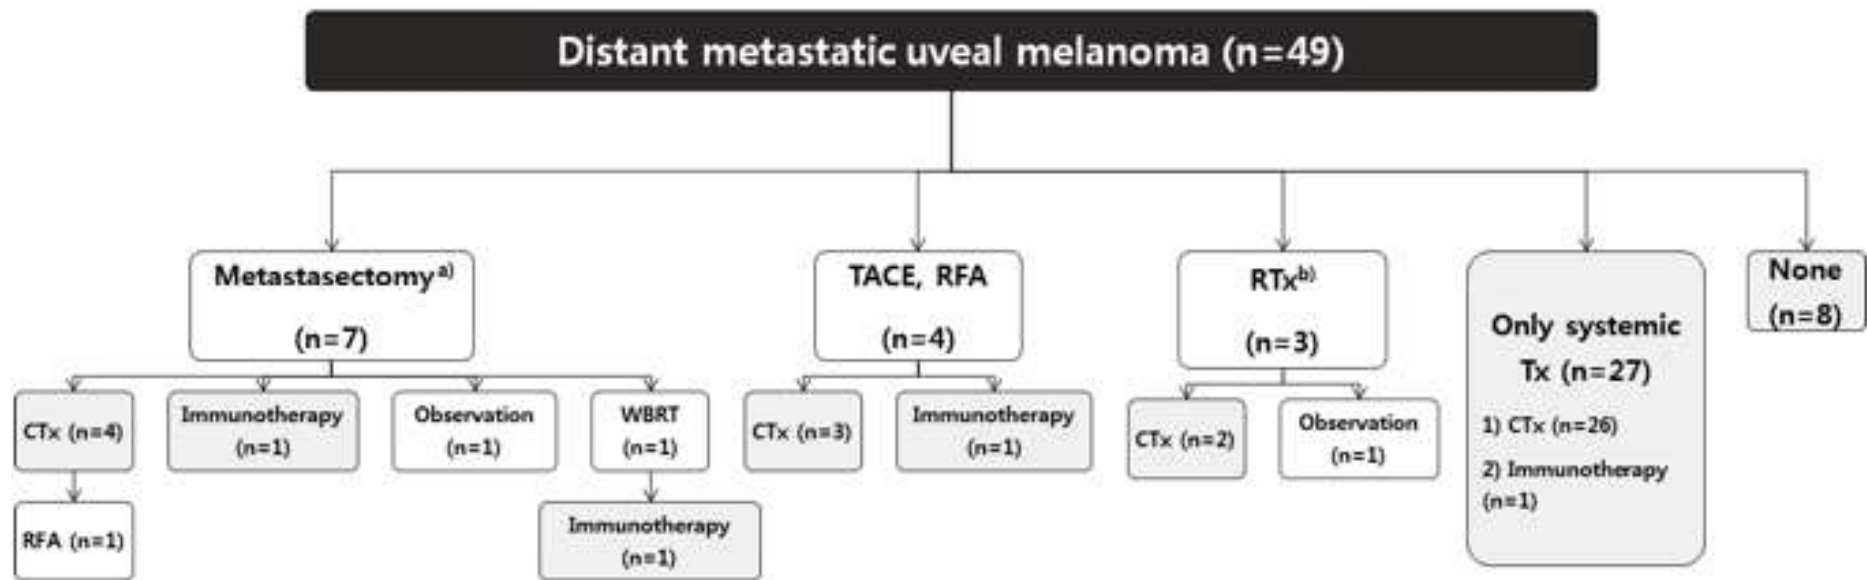

**S2 Fig.** Treatment strategy for distant metastatic uveal melanomas. CTx, Chemotherapy; RFA, radiofrequency ablation; WBRT, whole brain radiotherapy; TACE, transarterial chemoembolization; RTx, radiotherapy. <sup>a)</sup>Includes splenectomy, liver wedge resection, adrenalectomy, breast mass excision, lung lobectomy, skull craniectomy, maxillectomy, <sup>b)</sup>Includes radiotherapy to the nasal cavity, spine, adrenal gland, brain.
