# Supplementary material for: Prognoses and Clinical Outcomes of Primary and Recurrent Uveal Melanoma
Source: PubMed Central journal article supplement — Cancer Res Treat. 2017 Dec 28;50(4):1238–51. doi: 10.4143/crt.2017.534 (PMC6192910; doi:10.4143/crt.2017.534), 2017-12-28
Supplement: crt-2017-534-suppl3.pdf [file crt-2017-534-suppl3.pdf]

**S3 Table.** Response rates of patients with recurrent uveal melanoma treated with only first-line systemic therapies (n=27)

|                                   | Chemotherapy <sup>a)</sup><br>(n=26) | Immunotherapy <sup>b)</sup><br>(n=1) | p-value |
|-----------------------------------|--------------------------------------|--------------------------------------|---------|
| <b>Disease control rate (DCR)</b> |                                      |                                      |         |
| No. (%)                           | 11 (34.6)                            | 0                                    | 0.99    |
| 95% CI                            | 24.480-59.310                        | 0.000-83.250                         |         |
| CR                                | 0                                    | 0                                    |         |
| PR                                | 0                                    | 0                                    |         |
| SD                                | 9                                    | 0                                    |         |
| <b>PFS (mo)</b>                   |                                      |                                      |         |
| Median                            | 1.93                                 | 1.97                                 | 0.839   |
| 95% CI                            | 1.529-2.331                          | N/A                                  |         |
| <b>OS2 (mo)</b>                   |                                      |                                      |         |
| Median                            | 15.67                                | 3.83                                 | 0.033   |
| 95% CI                            | 13.260-18.080                        | N/A                                  |         |

PFS, progression-free survival (defined to the time interval from the initiation of first-line systemic therapies to the date of documented disease progression or death); OS2, overall survival (defined to the time from recurrence of uveal melanoma to death from any cause); 95% CI, 95% confidence interval; CR, complete response; PR, partial response; SD, stable disease. <sup>a)</sup>Includes dacarbazine, platinum-based regimen, topotecan, <sup>b)</sup>Includes interferon.
