# Supplementary material for: Prognoses and Clinical Outcomes of Primary and Recurrent Uveal Melanoma
Source: PubMed Central journal article supplement — Cancer Res Treat. 2017 Dec 28;50(4):1238–51. doi: 10.4143/crt.2017.534 (PMC6192910; doi:10.4143/crt.2017.534), 2017-12-28
Supplement: crt-2017-534-suppl4.pdf [file crt-2017-534-suppl4.pdf]

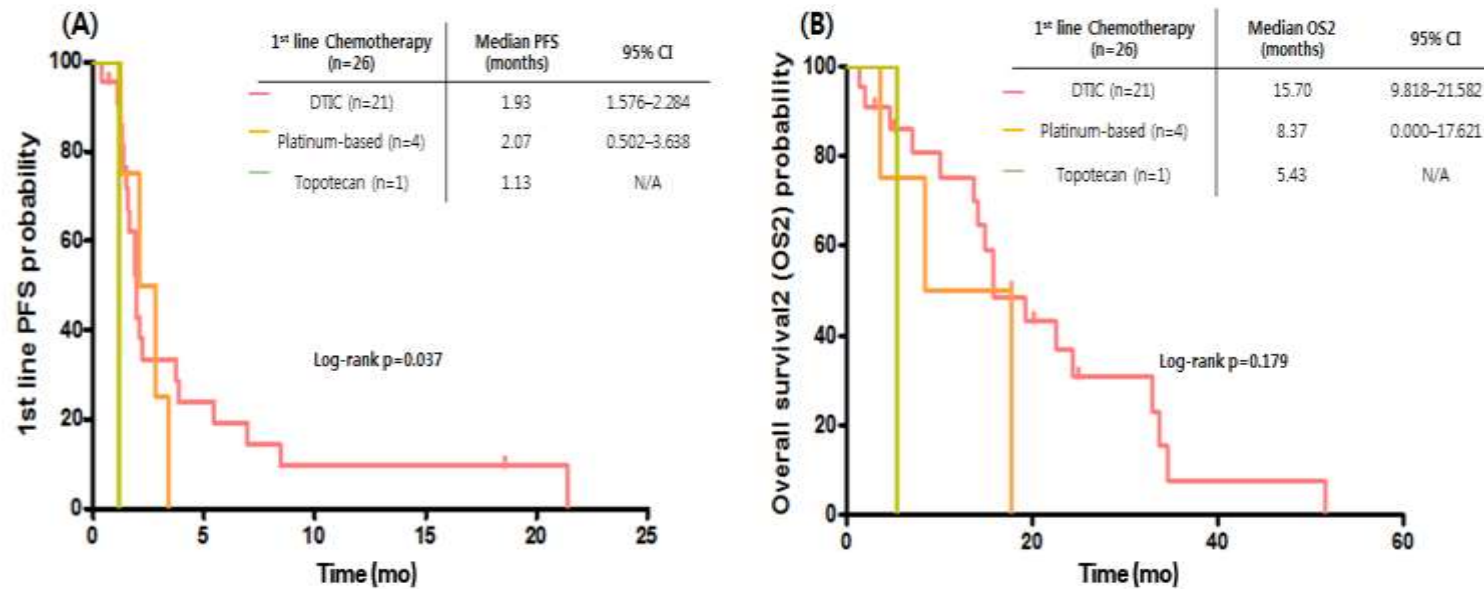

**S4 Fig.** Analysis of PFS (A) and OS2 (B) with first-line only systemic chemotherapies in patients with metastatic uveal melanoma. CI, confidence interval; PFS, progression-free survival (defined as the time interval from the initiation of first-line systemic therapies to the date of documented disease progression or death from any cause); OS2, overall survival 2 (defined as the time from recurrence of uveal melanoma to death from any cause).
